# Supplementary material for: Dynamic Covalent Colloidal Gel via RISA for Treating Synergistic Progression of Periodontitis and Dental Demineralization
Source: Research Square preprint supplement (doi:10.21203/rs.3.rs-7437803/v1), 2025-09-08
Supplement: Supplementary file 1 [file 7578bbf5b8322916d28b5a18.xlsx]

## Sheet: Fig. 1c
		PD (mm)
	Tooth positon	7	7	7	6	6	6	5	5	5	4	4	4	3	3	3	2	2	2	1	1	1	1	1	1	2	2	2	3	3	3	4	4	4	5	5	5	6	6	6	7	7	7
	Healthy	1	1	2	1	1	1	1	2	1	1	1	1	1	1	1	2	1	1	2	1	1	1	1	1	1	1	2	1	1	2	1	1	1	2	2	1	1	1	2	1	1	1
		1	1	1	1	1	2	2	1	1	2	1	2	1	2	2	1	2	2	1	1	2	2	1	1	1	1	2	2	1	1	1	2	2	1	1	1	1	1	1	1	2	1
		1	2	1	1	1	1	1	2	1	1	1	2	1	1	1	1	1	2	1	1	1	1	1	2	1	1	1	1	2	2	1	1	2	1	1	1	2	1	2	1	1	1
		1	1	2	1	2	2	1	1	1	1	1	2	1	1	1	1	2	2	1	1	1	1	1	1	1	2	1	1	1	1	2	1	1	1	1	1	1	1	2	1	2	1
	Gingivitis	4	4	4	4	4	4	4	3	4	3	2	3	3	2	2	2	2	3	2	2	2	3	3	3	3	3	2	3	3	2	3	3	3	3	2	3	4	3	4	4	3	4
		3	3	4	3	2	4	3	4	3	3	2	3	3	2	3	2	1	2	2	1	2	2	2	3	2	2	2	2	2	3	3	2	2	3	2	3	3	3	4	4	4	4
		3	3	3	3	2	3	3	3	2	2	2	2	2	2	3	3	2	3	3	3	4	3	2	3	3	2	3	2	2	2	2	2	3	3	2	3	3	2	3	3	2	3
		4	3	4	4	3	4	4	3	3	3	3	4	3	3	4	3	3	4	4	4	4	3	4	4	3	4	4	2	2	3	3	2	3	3	2	3	4	3	4	4	3	4
	Mild periodontitis	5	4	4	5	4	5	4	4	4	4	3	3	3	2	3	2	2	3	2	2	3	3	2	3	3	2	3	3	3	4	4	3	5	5	2	5	5	3	4	4	3	4
		4	3	5	4	3	4	4	2	4	4	3	2	3	2	3	3	2	2	2	2	2	2	2	2	3	2	3	3	2	5	3	3	4	4	4	4	5	2	5	4	2	5
		3	3	4	4	3	4	4	3	3	4	3	3	3	3	3	2	2	2	2	2	2	3	2	2	3	2	3	2	2	3	3	3	6	5	2	4	4	2	4	5	6	6
		5	4	6	6	5	5	4	3	4	5	4	4	4	3	4	3	2	2	3	3	3	4	4	3	4	3	2	3	2	3	3	3	4	4	3	5	4	4	5	5	6	5
	Moderate periodontitis	6	5	6	4	4	4	5	3	4	4	4	4	4	3	4	4	3	3	4	3	4	3	2	3	3	3	4	4	3	3	4	4	4	5	5	4	5	4	4	5	4	5
		5	4	6	5	4	5	5	4	5	4	4	4	5	4	4	5	4	5	5	3	4	3	2	3	4	4	4	4	4	5	5	4	5	4	5	6	6	4	5	5	5	4
		5	5	4	5	4	4	5	4	5	5	4	4	4	3	3	3	2	3	3	2	3	3	2	3	3	2	3	3	3	5	5	4	5	5	4	4	5	5	5	5	6	6
		5	4	5	5	4	5	4	4	4	4	3	4	4	3	4	3	3	3	3	2	3	3	3	3	3	3	3	4	3	4	4	3	4	5	4	4	5	4	5	5	6	5
	Severe periodontitis	5	6	7	7	6	6	7	5	4	3	4	5	4	3	4	3	4	4	4	2	4	4	3	4	4	3	4	3	2	3	4	4	5	5	4	4	5	7	7	9	8	7
		6	6	7	6	8	8	6	4	4	4	4	6	3	2	4	4	2	4	3	2	3	3	2	4	4	4	3	5	3	3	4	4	5	4	3	4	6	6	9	8	8	6
		5	4	6	5	6	4	5	3	4	4	3	3	2	4	3	3	3	3	2	2	2	3	3	3	3	3	3	4	4	4	4	4	6	4	4	4	6	8	8	6	6	7
		6	5	7	6	6	7	6	4	4	3	2	4	3	2	3	4	2	4	3	2	3	4	3	4	3	2	3	4	3	4	4	5	6	5	4	6	6	7	9	8	7	6

## Sheet: Fig. 1d
	.	BOP
	Tooth positon	7	6	5	4	3	2	1	1	2	3	4	5	6	7
	Healthy	1	1	1	1	1	1	1	1	1	1	1	1	1	1
		1	1	1	1	1	1	1	1	1	1	1	1	1	1
		1	1	1	1	1	1	1	1	1	1	1	1	1	1
		1	1	1	1	1	1	1	1	1	2	1	1	2	1
	Gingivitis	2	3	2	2	1	1	1	1	1	1	1	2	2	2
		2	2	1	1	1	1	1	1	1	1	1	1	2	2
		1	1	1	1	1	1	2	2	1	1	1	1	2	2
		1	2	1	1	1	2	3	4	1	1	1	1	2	2
	Mild periodontitis	2	3	2	2	1	1	1	2	2	2	2	3	2	2
		2	2	2	2	1	1	1	2	1	3	2	2	2	2
		2	3	2	2	2	1	1	2	2	1	2	3	2	2
		3	3	2	2	2	2	1	1	1	2	2	2	2	2
	Moderate periodontitis	3	3	2	2	2	2	1	1	1	1	2	2	3	2
		2	3	3	2	1	1	1	2	2	2	2	3	3	2
		2	2	1	1	1	2	1	1	2	2	2	2	2	2
		2	2	2	2	2	2	1	1	2	2	2	2	2	2
	Severe periodontitis	2	3	3	3	3	2	2	2	2	2	2	4	3	3
		3	3	3	2	2	2	2	2	2	3	3	4	4	3
		3	4	3	3	2	2	2	2	2	2	2	2	3	3
		4	4	3	3	2	2	3	3	2	2	2	3	4	4

## Sheet: Fig. 1e and 1f
		PD < 4	4 ≤ PD < 6	6 ≤ PD < 8	8 ≤ PD < 10	PD ≥ 10
	Healthy	93	7	0	0	0
	Gingivitis	32	68	0	0	0
	Mild periodontitis	54	25	21	0	0
	Moderate periodontitis	28	60	8	4	0
	Severe periodontitis	0	18	36	17	29
		BI < 2	2 ≤ BI < 3	3≤ BI < 4	4 ≤ BI < 5	BI ≥ 5
	Healthy	82	18	0	0	0
	Gingivitis	25	61	14	0	0
	Mild periodontitis	14	65	21	0	0
	Moderate periodontitis	7	43	50	0	0
	Severe periodontitis	4	55	30	7	4

## Sheet: Fig. 1g
		Saliva				Gingival crevicular fluid				Alveolar socket blood
		Mean PD (mm)	cfDNA (ng/mL)			Mean PD (mm)	cfDNA (ng/mL)			Mean PD (mm)	cfDNA (ng/mL)
	Healthy	1.7	27.2025		Healthy	1.7	346.643		Healthy	1.44	1994.62
		2	49.2684			2	617.207			1.59	3646.39
		1.8	47.133			1.8	351.784			1.7	3130.34
	Gingivitis	3.27	35.4278		Gingivitis	3.27	305.754			2	1425.57
		3.43	30.0497			3.43	440.601			1.8	1793.73
		3.59	42.3876			3.59	300.06		Periodontitis	7.4	7011.24
	Mild periodontitis	5.17	60.8154		Mild periodontitis	5.17	337.627			8.67	7244.16
		4.54	39.3822			4.54	345.773			9.62	8336.38
	Moderate periodontitis	4.86	32.7388			4.86	321.809			6.92	7527.89
		6.92	232.755		Moderate periodontitis	6.92	692.421			6.6	4631.05
		6.6	70.6224			6.6	672.649
		5.65	42.7831			5.65	295.473
	Severe periodontitis	7.4	313.742		Severe periodontitis	7.4	3334.55
		8.67	245.884			8.67	2804.5
		9.62	497.229			9.62	2897.66
		Saliva				Gingival crevicular fluid				Alveolar socket blood
		Mean PD (mm)	LPS (ng/mL)			Mean PD (mm)	LPS (ng/mL)			Mean PD (mm)	LPS (ng/mL)
	Healthy	1.7	0.037959		Healthy	1.7	0.728596		Healthy	1.44	0.16359
		2	0.254628			2	0.709818			1.59	0.083643
		1.8	0.192804			1.8	0.619988			1.7	0.076395
	Gingivitis	3.27	0.551572		Gingivitis	3.27	0.869491			2	0.326118
		3.43	0.767471			3.43	0.822599			1.8	0.331684
		3.59	0.857411			3.59	0.857411		Periodontitis	7.4	1.21684
	Mild periodontitis	5.17	0.887004		Mild periodontitis	5.17	0.734087			8.67	2.25077
		4.54	0.463279			4.54	0.82227			9.62	1.87234
	Moderate periodontitis	4.86	0.799648			4.86	0.887831			6.92	0.680497
		6.92	0.892004		Moderate periodontitis	6.92	0.79251			6.6	0.572547
		6.6	0.812936			6.6	0.910563
		5.65	0.691478			5.65	0.866746
	Severe periodontitis	7.4	0.918377		Severe periodontitis	7.4	0.915724
		8.67	0.915944			8.67	0.814363
		9.62	1.04772			9.62	0.925058

## Sheet: Fig. 1h
		Saliva				Gingival crevicular fluid				Alveolar socket blood
		Mean PD (mm)	cfDNA (ng/mL)			Mean PD (mm)	cfDNA (ng/mL)			Mean PD (mm)	cfDNA (ng/mL)
	Healthy	1.07143	27.2025		Healthy	1.07143	346.643		Healthy	1.07143	1994.62
		1.08929	49.2684			1.08929	617.207			1.14286	3646.39
		1.05357	47.133			1.05357	351.784			1.08929	3130.34
	Gingivitis	1.96429	35.4278		Gingivitis	1.96429	440.601			1.05357	1425.57
		1.44643	30.0497			1.44643	305.754			1.03571	1793.73
		1.80357	42.3876			1.80357	300.06		Periodontitis	2.625	7011.24
	Mild periodontitis	2.35714	60.8154		Mild periodontitis	2.35714	337.627			2.875	7244.16
		1.80357	39.3822			1.80357	321.809			2.67857	8336.38
	Moderate periodontitis	1.89286	32.7388			1.89286	345.773			2.77083	7527.89
		2.38	232.755		Moderate periodontitis	2.38	692.421			2.53571	4631.05
		1.91071	70.6224			1.91071	295.473
		2.26786	42.7831			2.26786	672.649
	Severe periodontitis	2.875	497.229		Severe periodontitis	2.875	3334.55
		2.67857	245.884			2.67857	2804.5
		2.77083	313.742			2.77083	2897.66
		Saliva				Gingival crevicular fluid				Alveolar socket blood
		Mean PD (mm)	LPS (ng/mL)			Mean PD (mm)	LPS (ng/mL)			Mean PD (mm)	LPS (ng/mL)
	Healthy	1.07143	0.037959		Healthy	1.07143	0.728596		Healthy	1.07143	0.16359
		1.08929	0.192804			1.08929	0.709818			1.14286	0.326118
		1.05357	0.254628			1.05357	0.619988			1.08929	0.331684
	Gingivitis	1.96429	0.857411		Gingivitis	1.96429	0.869491			1.05357	0.083643
		1.44643	0.551572			1.44643	0.822599			1.03571	0.076395
		1.80357	0.767471			1.80357	0.857411		Periodontitis	2.625	0.680497
	Mild periodontitis	2.35714	0.887004		Mild periodontitis	2.35714	0.887831			2.875	2.25077
		1.80357	0.892004			1.80357	0.734087			2.67857	1.21684
	Moderate periodontitis	1.89286	0.799648			1.89286	0.82227			2.77083	1.87234
		2.38	0.463279		Moderate periodontitis	2.38	0.910563			2.53571	0.572547
		1.91071	0.691478			1.91071	0.79251
		2.26786	0.812936			2.26786	0.866746
	Severe periodontitis	2.875	0.918377		Severe periodontitis	2.875	0.915724
		2.67857	1.04772			2.67857	0.814363
		2.77083	0.915944			2.77083	0.925058

## Sheet: Fig. 1j
		Healthy			Periodontitis
	NETs area (%)	0.015	0.027	0.01	26.214	19.855	29.003

## Sheet: Fig. 1k
	Distance (µm)	0	0.4586	0.9173	1.3759	1.8346	2.2932	2.7518	3.2105	3.6691	4.1277	4.5864	5.045	5.5037	5.9623	6.4209	6.8796	7.3382	7.7969	8.2555	8.7141	9.1728	9.6314	10.09	10.5487	11.0073	11.466	11.9246	12.3832	12.8419	13.3005	13.7592	14.2178	14.6764	15.1351	15.5937	16.0523	16.511	16.9696	17.4283	17.8869	18.3455	18.8042	19.2628	19.7215	20.1801	20.6387	21.0974	21.556
	Healthy	0	0.2327	0.3955	0.4056	0.4283	0.4327	0.415	0.3655	0.0365	0	0.0566	0.7741	1.4789	3.3619	9.007	26.8752	56.5721	94.1251	108.023	108.667	108.667	108.667	108.667	108.667	108.53	108.498	108.538	107.111	107.106	108.18	108.648	108.392	107.836	108.621	105.926	96.1773	87.3318	77.4705	55.1538	24.3046	10.6625	7.2907	6.3135	6.1081	4.3485	2.5334	1.9637	1.1193
	Periodontitis	66	60.7969	60.8876	63.4077	62.2334	56.0496	51.1183	45.8841	41.7925	39.1676	36.0689	32.92	29.9704	27.675	25.4607	24.3664	22.5194	23.1712	35.9138	66.7523	91.168	100.858	101.467	101.333	101.333	101.333	101.333	101.333	101.333	101.333	101.333	101.333	101.333	101.333	101.333	101.333	101.296	97.3135	63.049	32.6305	30.8347	28.7894	23.2772	18.3062	17.7067	21.3196	25.3052	29.2754
[truncated: 6 more columns]

## Sheet: Fig. 2c
		Size (nm)	0.4	0.463	0.536	0.621	0.719	0.833	0.965	1.12	1.29	1.5	1.74	2.01	2.33	2.7	3.12	3.62	4.19	4.85	5.61	6.5	7.53	8.72	10.1	11.7	13.5	15.7	18.2	21	24.4	28.2	32.7	37.8	43.8	50.7	58.8	68.1	78.8	91.3	106	122	142	164	190	220	255	295	342
	Intensity (%)	Mix	0	0	0	0	0	0	0	0	0	0	0	0	0	0	0	0	0	0	0	0	0	0	0	0	0	0	0	0	0	0	0	0	0	0	0.0727	0.736	2.03	3.74	5.53	7.1	8.27	8.92	9.09	8.82	8.23	7.41	6.45
			0	0	0	0	0	0	0	0	0	0	0	0	0	0	0	0	0	0	0	0	0	0	0	0	0	0	0	0	0	0	0	0	0	0	0	0	1.31	3.65	6.15	8.06	9.06	9.14	8.53	7.54	6.45	5.46	4.68
			0	0	0	0	0	0	0	0	0	0	0	0	0	0	0	0	0	0	0	0	0	0	0	0	0	0	0	0	0	0	0.0423	0.0542	0.0239	0.0572	0.308	0.899	1.88	3.2	4.73	6.32	7.76	8.89	9.56	9.72	9.35	8.51	7.31
		PFE	0	0	0	0	0	0	0	0	0	0	0	0	0	0	0	0	0	0	0	0	0	0	0	0	0	0	0	0	0	0.000191	0.938	2.92	5.59	8.41	10.8	12.5	13	12.5	11	8.9	6.44	4.04	2.06	0.726	0.0949	0	0
			0	0	0	0	0	0	0	0	0	0	0	0	0	0	0	0	0	0	0	0	0	0	0	0	0	0	0	0	0	0	0	0	0.847	3.38	7.23	11.4	14.7	16.2	15.6	13.2	9.43	5.46	2.22	0.403	0	0	0
			0	0	0	0	0	0	0	0	0	0	0	0	0	0	0	0	0	0	0	0	0	0	0	0	0	0	0.117	0.587	1.05	1.29	1.4	1.7	2.51	4.01	6.11	8.49	10.7	12.2	12.7	12	10.1	7.52	4.68	2.21	0.598	0	0
[truncated: 22 more columns]

## Sheet: Fig. 2d and 2e
		Mix			PFE
	PDI	0.31	0.272	0.29	0.173	0.182	0.188
		Mix			PFE
	Zeta potential (mV)	38.8	40.8	41	10.6	10.6	9.87

## Sheet: Fig. 2f
		Wavelength (nm)	251	252	253	254	255	256	257	258	259	260	261	262	263	264	265	266	267	268	269	270	271	272	273	274	275	276	277	278	279	280	281	282	283	284	285	286	287	288	289	290	291	292	293	294	295	296	297
	Absorbance (arb. units)	PAMAM	0.985039	0.972222	0.957718	0.944048	0.934312	0.931849	0.935065	0.943371	0.956381	0.973179	0.99326	1.01651	1.04277	1.07224	1.10438	1.13822	1.17309	1.20794	1.24281	1.27753	1.31239	1.34732	1.38239	1.417	1.45005	1.48229	1.51295	1.5411	1.56715	1.58926	1.60764	1.62115	1.62973	1.63501	1.63526	1.63112	1.62287	1.61004	1.59274	1.57021	1.54296	1.5115	1.47539	1.43548	1.39236	1.34681	1.29864
		FPBA	2.58633	2.59753	2.604	2.60398	2.59311	2.56789	2.52524	2.46177	2.38563	2.29078	2.17488	2.04308	1.89863	1.74677	1.59004	1.43546	1.28631	1.14635	1.01797	0.90324	0.803039	0.717918	0.647476	0.590569	0.545896	0.511695	0.486195	0.467924	0.455573	0.448143	0.444572	0.443766	0.444739	0.446811	0.44915	0.451012	0.451919	0.451687	0.450053	0.44672	0.442012	0.435864	0.428098	0.418642	0.407291	0.39405	0.378876
		EGCG	1.01994	1.0485	1.08936	1.142	1.20419	1.2718	1.34461	1.42018	1.49752	1.57594	1.65434	1.73244	1.809	1.88446	1.95594	2.02316	2.08197	2.13391	2.17379	2.20624	2.231	2.24766	2.25978	2.2663	2.26375	2.25286	2.2282	2.1984	2.15882	2.10675	2.05024	1.98826	1.92315	1.85718	1.79275	1.73532	1.68052	1.62646	1.57449	1.52424	1.47395	1.42433	1.37465	1.32518	1.27532	1.22482	1.17348
		PFE	2.57126	2.58354	2.59542	2.60769	2.62295	2.62319	2.61616	2.59262	2.56041	2.51459	2.45379	2.3813	2.30764	2.22238	2.13747	2.05156	1.96772	1.88859	1.81453	1.74392	1.68241	1.62931	1.58468	1.54759	1.51745	1.49256	1.47182	1.4532	1.43559	1.41818	1.40152	1.3846	1.36871	1.35368	1.33915	1.32499	1.31029	1.29549	1.28011	1.26375	1.24659	1.2284	1.20883	1.18762	1.16492	1.14081	1.11509
[truncated: 53 more columns]

[truncated: 33 more sheets: Fig. 2h, Fig. 2m and 2n, Fig. 3a and 3b, Fig. 3c, Fig. 3d, Fig. 3f, Fig. 3g and 3h, Fig. 3j-s, Fig. 4a, Fig. 4b, Fig. 4c, Fig. 4i, Fig. 5b, Fig. 5c, Fig. 5d, Fig. 5g, Fig. 5h, Fig. 5i, Fig. 6c-e, Fig. 6g …]
